# Supplementary material for: Three-dimensional composite of Co3O4 nanoparticles and nitrogen-doped reduced graphene oxide for lignin model compound oxidation
Source: Royal Society of Chemistry journal article supplement (doi:10.1039/c8nj01533c), 2018-01-01
Supplement: c8nj01533c1.pdf [file c8nj01533c1.pdf]

## Supplementary Information

### **Three-dimensional Composite of Co<sub>3</sub>O<sub>4</sub> Nanoparticles and Nitrogen Doped Reduced Graphene Oxide for Lignin Model Compounds Oxidation**

*Jiali Zhang,<sup>§a</sup> Fangwei Zhang,<sup>§a</sup> Shouwu Guo<sup>\*a</sup> and Jingyan Zhang<sup>\*b</sup>*

<sup>a</sup> Department of Electronic Engineering, School of Electronic Information and Electrical Engineering, Shanghai Jiao Tong University, Shanghai 200240, P.R. China

<sup>b</sup> State Key Laboratory of Bioreactor Engineering, Shanghai Key Laboratory of New Drug Design, School of Pharmacy, East China University of Science and Technology, Shanghai 200237, P. R. China

Correspondence should be addressed: [swguo@sjtu.edu.cn](mailto:swguo@sjtu.edu.cn) or [jyzhang@ecust.edu.cn](mailto:jyzhang@ecust.edu.cn)

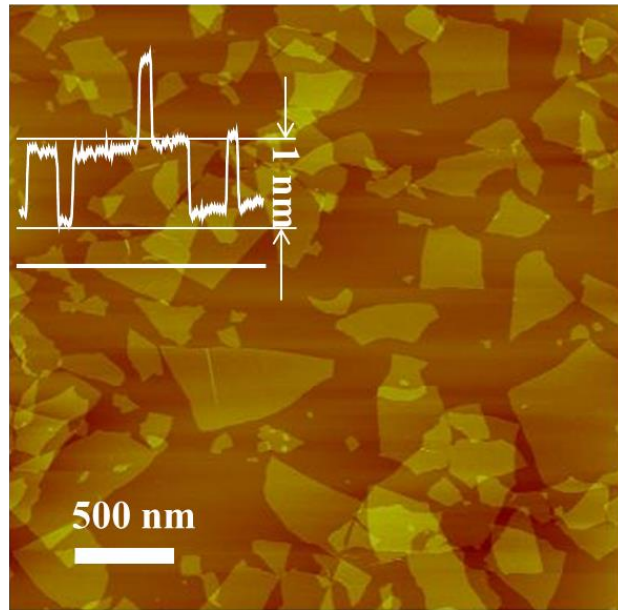

**Figure S1.** AFM image of the GO used in the work. Inset is the height profile of GO. The height of GO is  $\sim 1$  nm, revealing their single atomic layer motif.

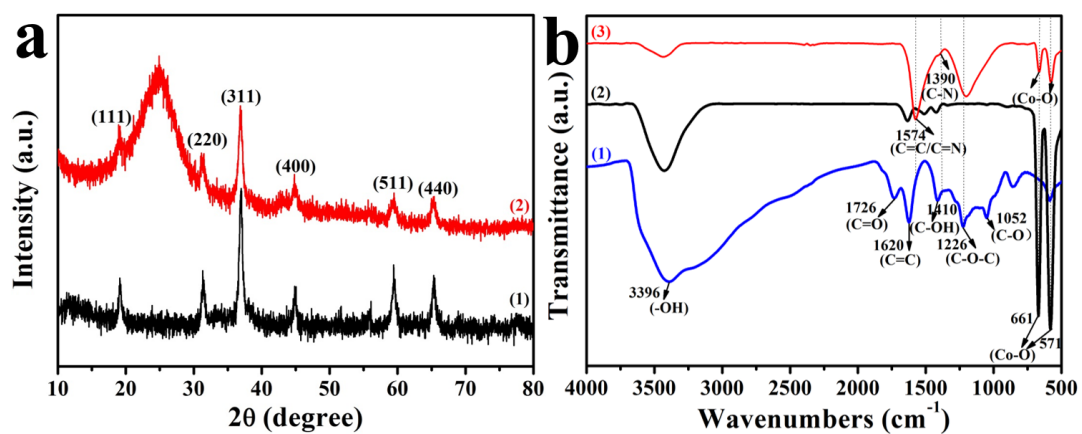

**Figure S2.** (a) XRD patterns of  $\text{Co}_3\text{O}_4$  nanoparticles (1) and 3D  $\text{Co}_3\text{O}_4/\text{N-rGO}$  (2), (b) FT-IR spectra of the GO (1),  $\text{Co}_3\text{O}_4$  nanoparticles (2) and 3D  $\text{Co}_3\text{O}_4/\text{N-rGO}$  (3).

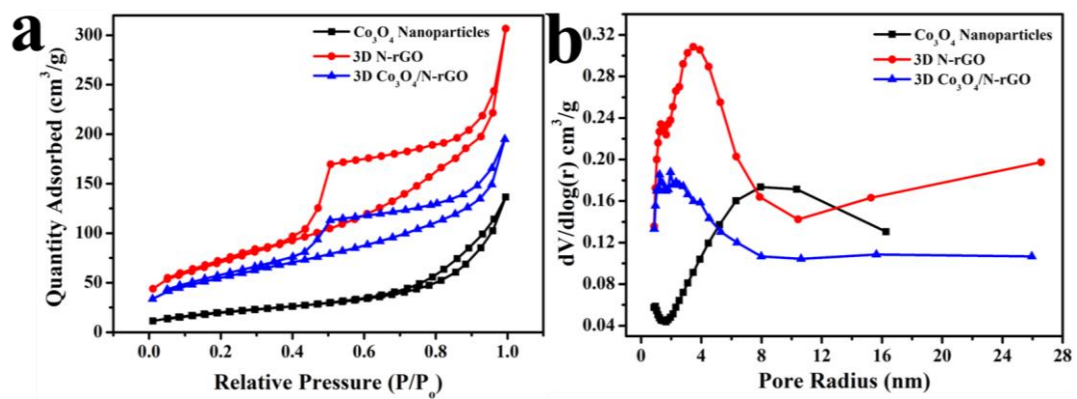

**Figure S3.**  $N_2$  adsorption/desorption isotherms (a) and pore size distributions (b) of  $Co_3O_4$  nanoparticles, 3D N-rGO and 3D  $Co_3O_4/N-rGO$ .

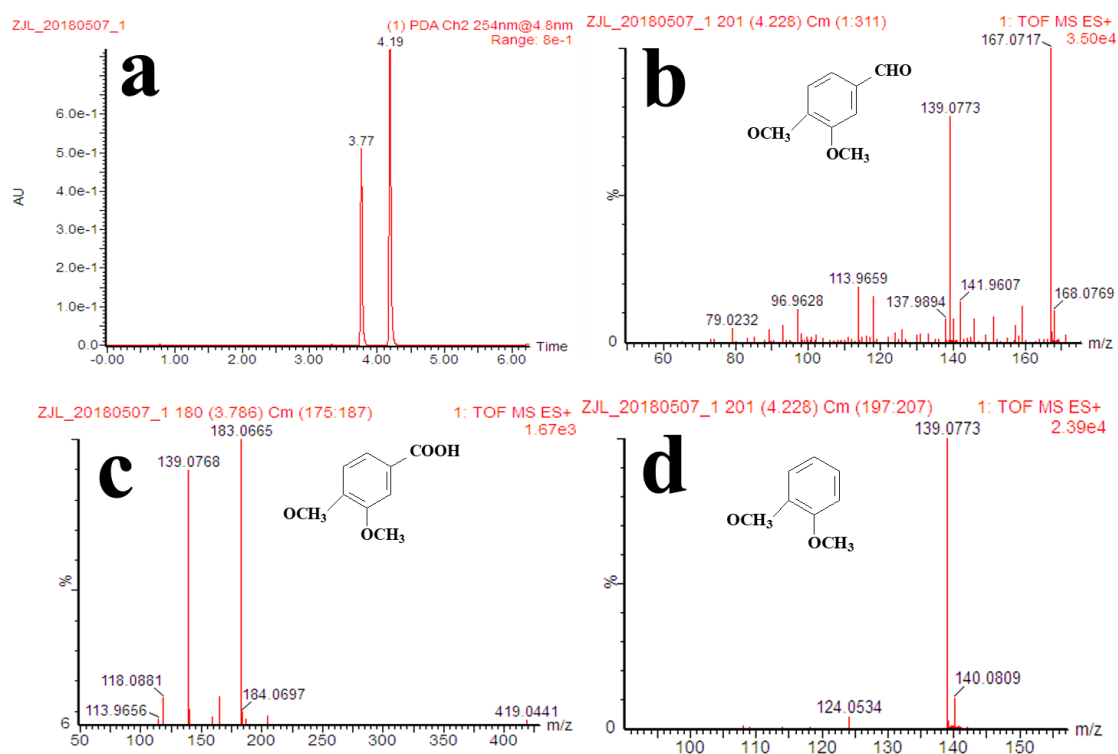

**Figure S4.** (a) UPLC of the oxidation product of VA. (b-d) Mass spectrum of the oxidation products of VA under ESI<sup>+</sup> mode.

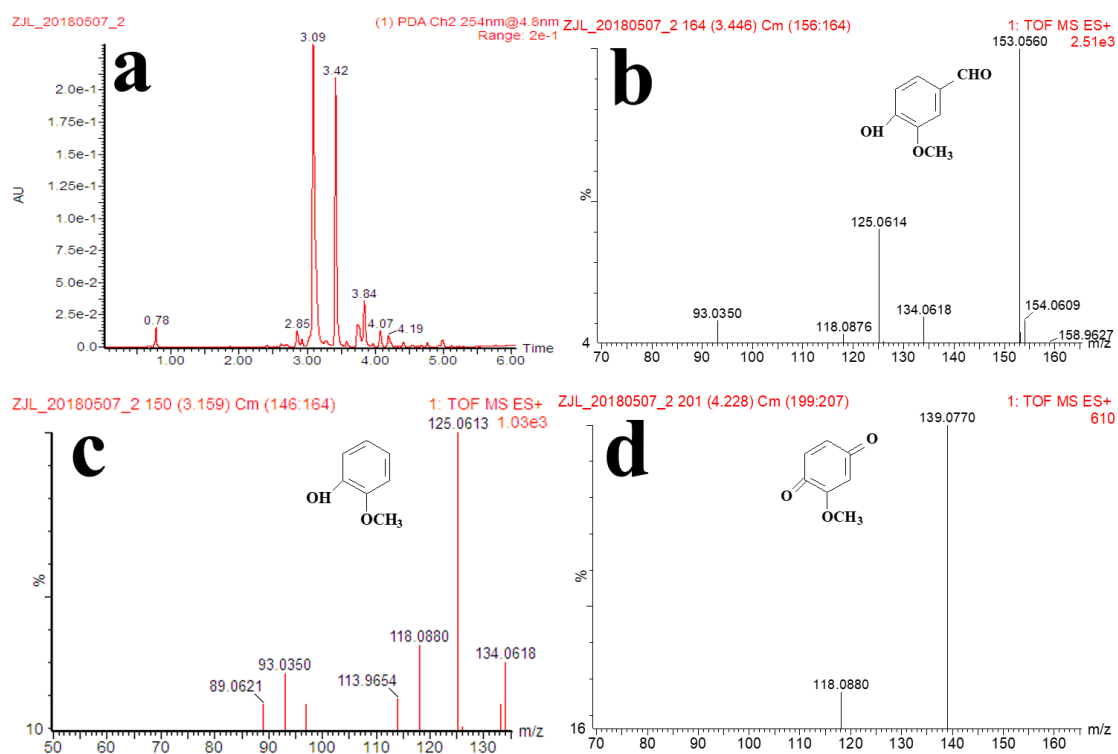

**Figure S5.** (a) UPLC of the oxidation product of vanillyl alcohol. (b-d) Mass spectrum of the oxidation products of vanillyl alcohol under ESI<sup>+</sup> mode.

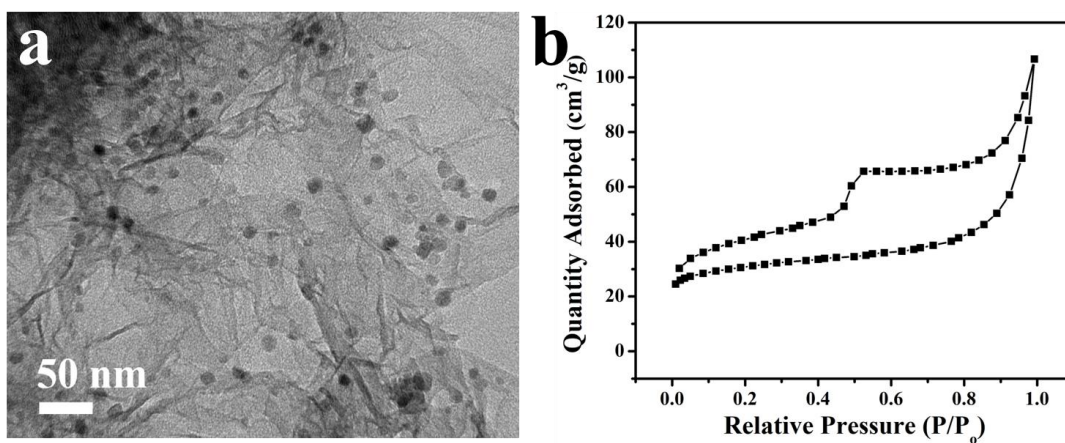

**Figure S6.** TEM image (a) and N<sub>2</sub> adsorption/desorption isotherm (b) of the 3D Co<sub>3</sub>O<sub>4</sub>/N-rGO after the 5<sup>th</sup> catalytic cycling runs.
